# Supplementary material for: Ex vivo organotypic culture system of precision-cut slices of human pancreatic ductal adenocarcinoma
Source: PubMed Central journal article supplement (PMC6376017; doi:10.1038/s41598-019-38603-w), 2019-02-14
Supplement: 41598_2019_38603_MOESM1_ESM.pdf [file 41598_2019_38603_MOESM1_ESM.pdf]

## Supplementary Information

### **Ex vivo organotypic culture system of precision-cut slices of human pancreatic ductal adenocarcinoma**

**Sougat Misra<sup>1,§</sup>, Carlos F. Moro<sup>1,3,§</sup>, Marco Del Chiaro<sup>2</sup>, Soledad Pouso<sup>3</sup>, Anna Sebestyén<sup>4</sup>,  
Matthias Löhr<sup>2</sup>, Mikael Björnstedt<sup>1</sup>, Caroline S. Verbeke<sup>3,5,6</sup>**

*<sup>1</sup>Department of Laboratory Medicine, Division of Pathology F46, Karolinska Institutet, Karolinska University Hospital Huddinge, SE-141 86 Stockholm, Sweden*

*<sup>2</sup>Department of Clinical Intervention and Technology (CLINTEC), Center for Digestive Diseases, Karolinska University Hospital and Division of Surgery, Karolinska Institutet, Stockholm 14186, Sweden*

*<sup>3</sup>Department of Clinical Pathology/Cytology, Karolinska University Hospital, Stockholm SE-141 86, Sweden*

*<sup>4</sup>Tumour Biology Laboratory, 1st Department of Pathology and Experimental Cancer Research, Semmelweis University, Budapest 1085 Ulloi ut 26., Hungary*

*<sup>5</sup>Institute of Clinical Medicine, University of Oslo, Postbox 1171 Blindern, Oslo 0318, Norway*

*<sup>6</sup>Department of Pathology, Oslo University Hospital, Rikshospitalet, Postbox 4956 Nydalen, Oslo 0424, Norway*

**Running title:** Pancreatic cancer in a dish

**\*Corresponding author:** Caroline S. Verbeke

Department of Pathology, Institute of Clinical Medicine, University of Oslo, Oslo, Norway

E-mail: c.s.verbeke@medisin.uio.no, caroline.verbeke@ki.se

Tel. +47-23071498, Fax. +47-23070001

**Key words:** Pancreas, adenocarcinoma, ex vivo, organotypic model, tissue slice technology

**§**Both authors have contributed equally

## Supplementary Figure S1

### Outline of the investigations

Preliminary basic optimization steps (data not shown)

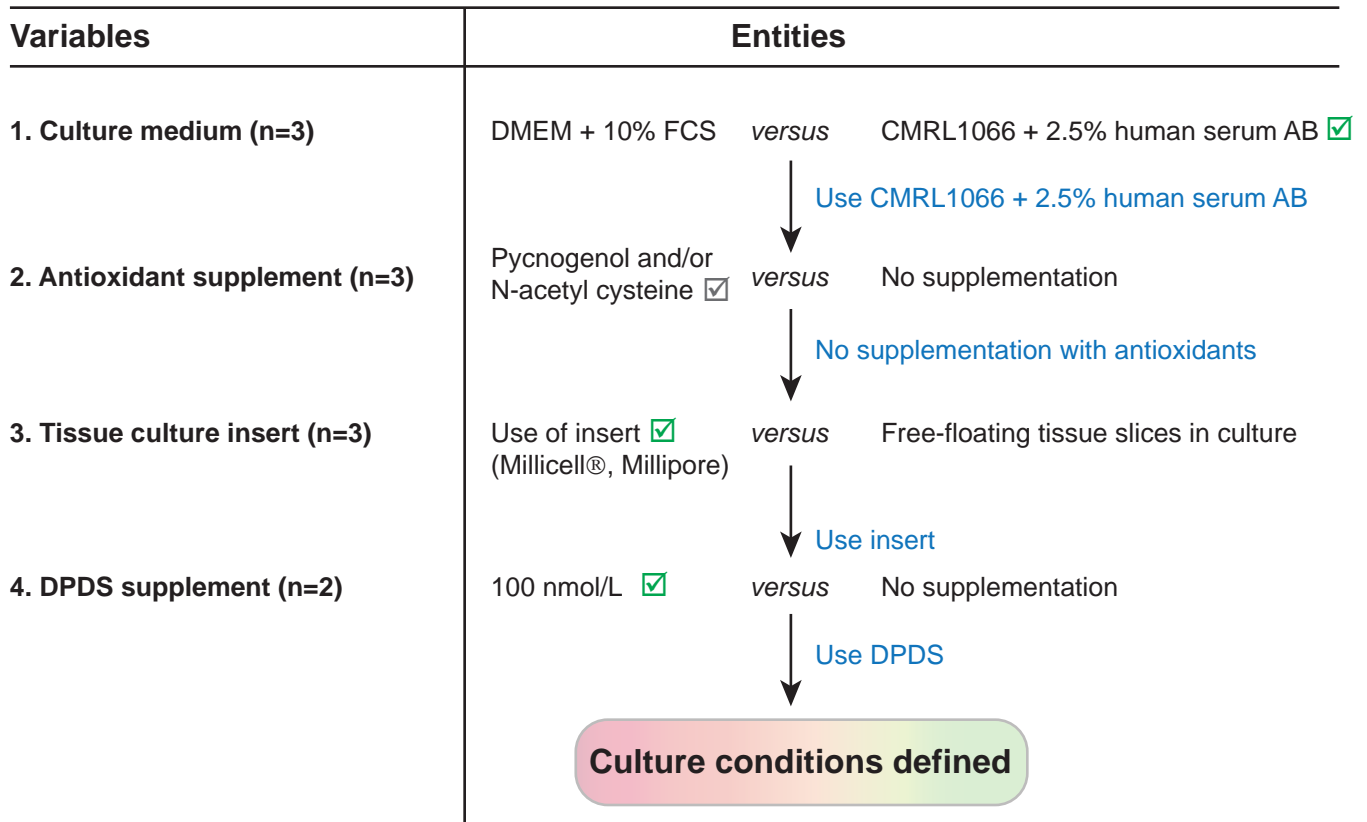

indicates entities the use of which resulted in better tissue survival

indicates entities the use of which did not make any difference in tissue survival

### Characterization of tissue slices (Fig. 2-8)

1. Tissue viability: H&E staining, TEM, quantification, n=12
2. Cell outgrowth: H&E staining, IHC, quantification, n=12
3. Proliferative activity: IHC, n=7
4. Immunohistochemical phenotyping:
  - cancer: n=2-6
  - microenvironment: n=2-6
5. Metabolic activity: quantification, n=5

### Assessment of effect of oxygen tension (Fig. 9-10)

1. Hyperoxic (41%) versus normoxic (21%) conditions: n=3
2. Hypoxia assessment *in situ*: n=1-3
3. Histomorphological characterization: n=3
4. Tissue viability: H&E staining, quantification, n=3
5. Cell outgrowth: H&E staining, IHC, quantification, n=3

**Supplementary Figure S1.** A flow chart showing experimental progression and different endpoint analyses.

### Supplementary Figure S2

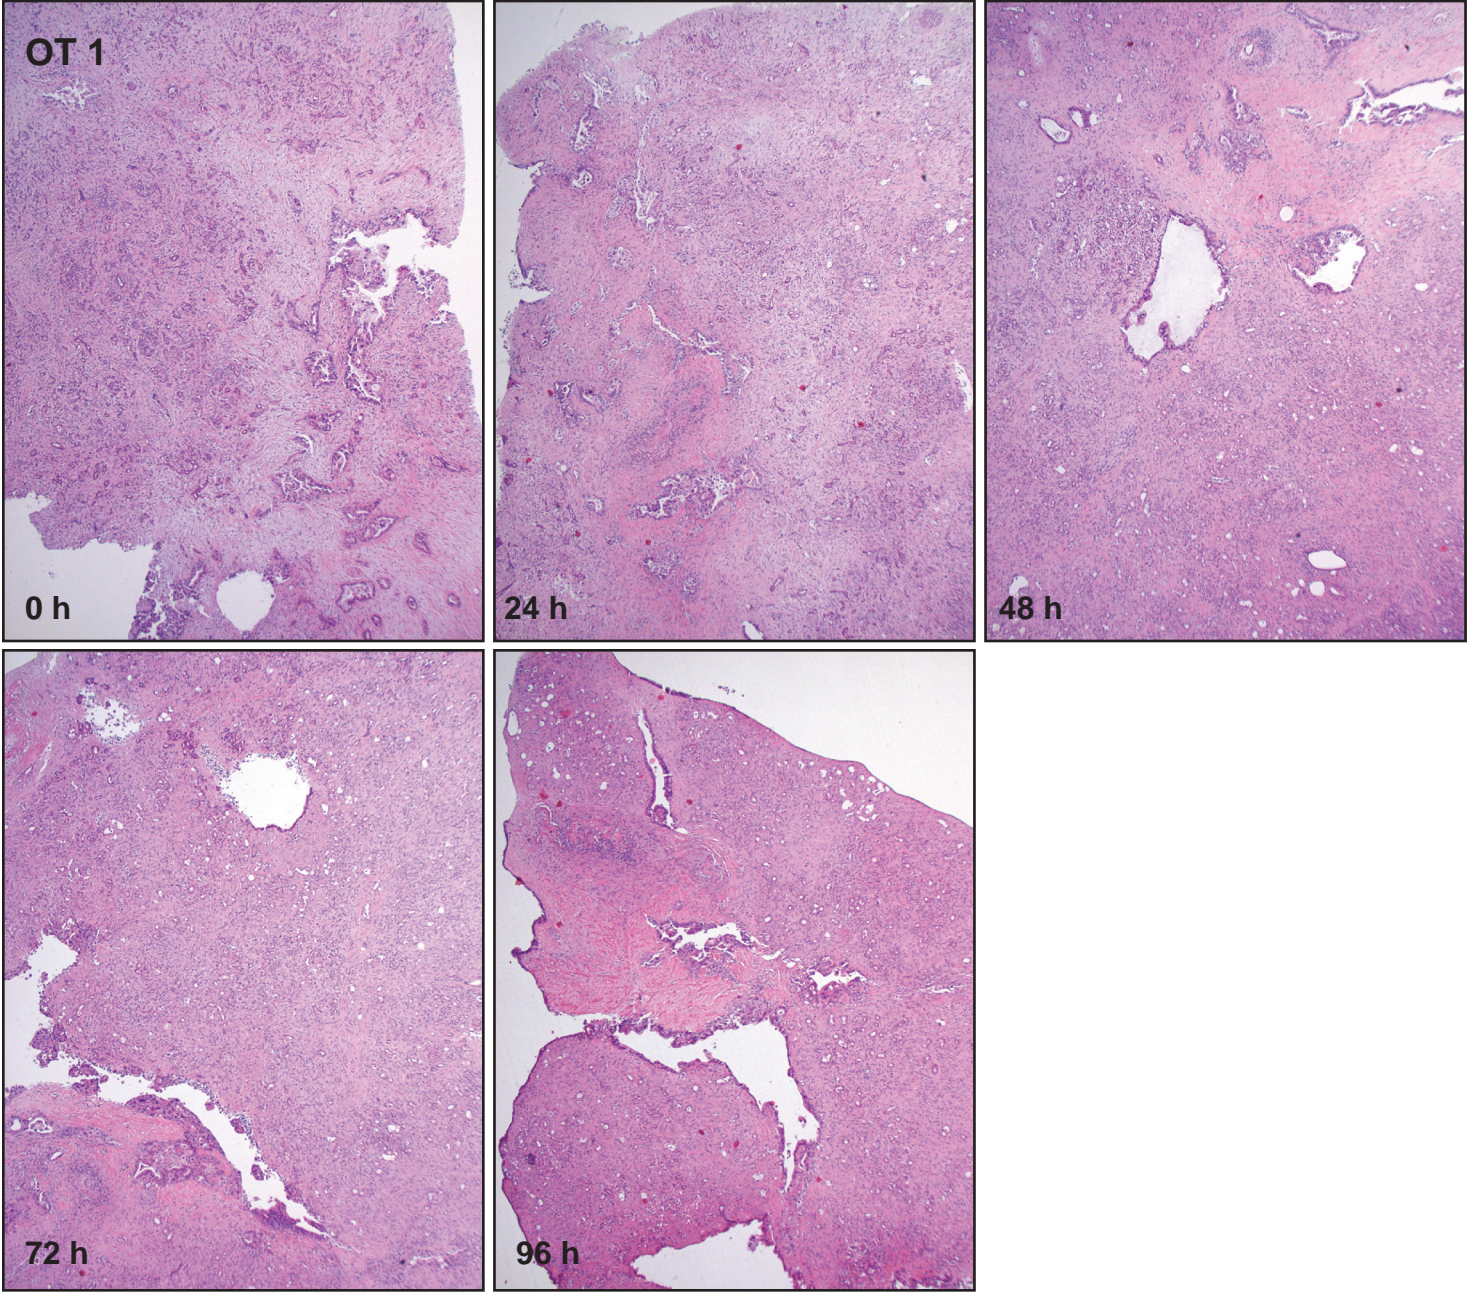

**Supplementary Figure S2.** Low magnification (4X) images of H&E-stained control (0 h) and cultured (24h -96 h) tissue slices.

## Supplementary Figure S3

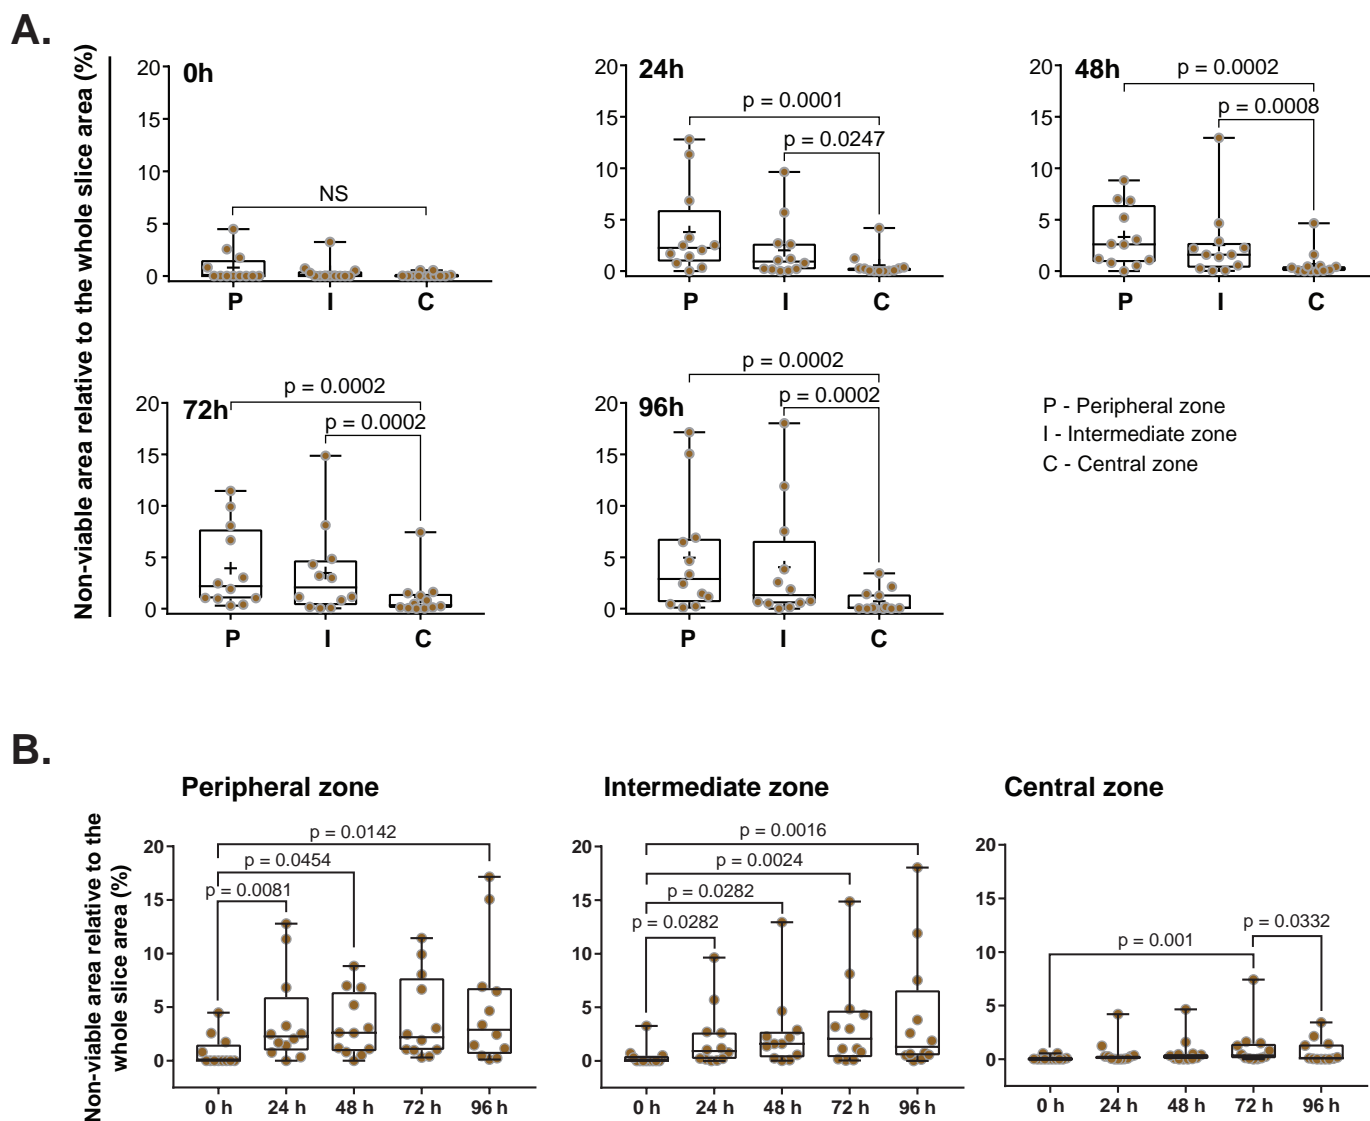

**Supplementary Figure S3. (A)** Quantification of non-viable tissue areas at different time points and for the three tissue zones. At culture initiation (0 h), there were no significant differences in the extent of non-viable tissue areas ( $p > 0.05$ ). At later time points (24 h – 96 h), non-viable tissue area was significantly higher in the periphery and the intermediate zones than in the central zone ( $n=12$ ; Friedman test followed by two-stage linear step-up multiple comparison procedure according to Benjamini, Krieger and Yekutieli;  $p < 0.05$ ). **(B)** Temporal changes in tissue viability within a defined zone. In all zones, significant changes in tissue viability were observed compared to the control at 0 h (similar statistical analysis as above;  $p < 0.05$ ). Following damage within the first 24 h of culture, no further increase in non-viable tissue area could be observed, except for the central zone in which tissue viability was significantly lower at 72 h.

# Supplementary Figure S4

**A.**

Cancer-associated stroma (OT5)

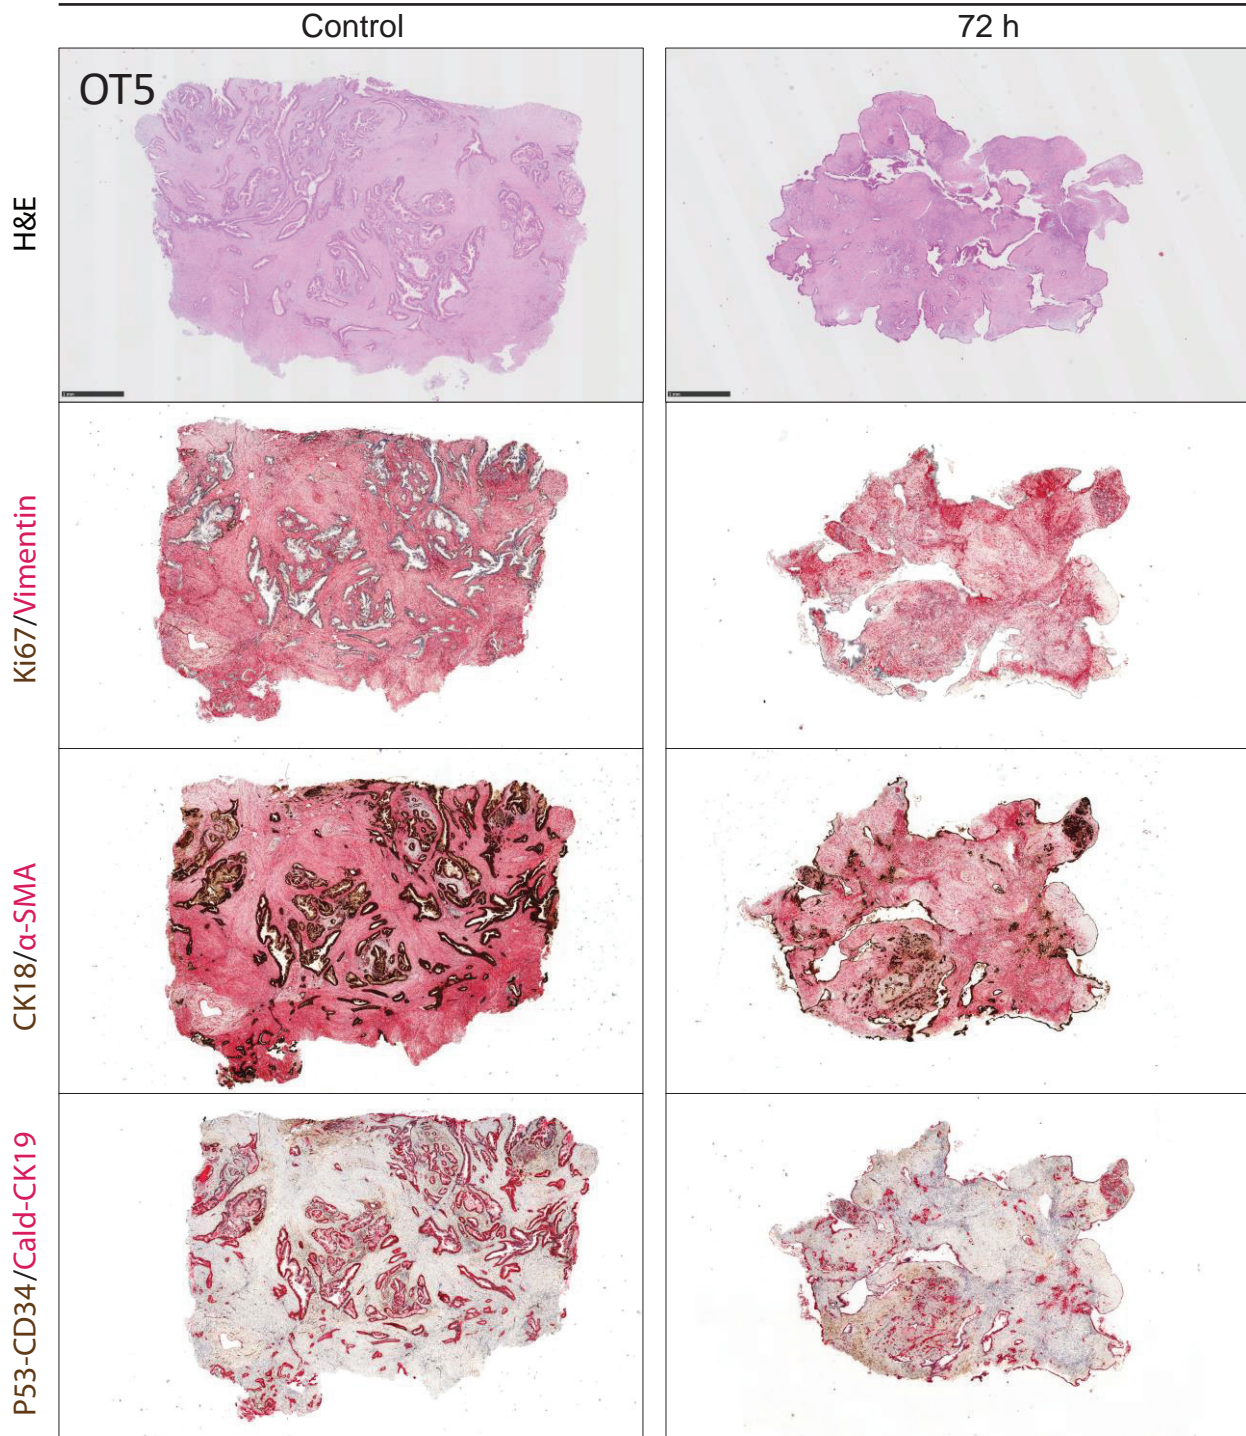

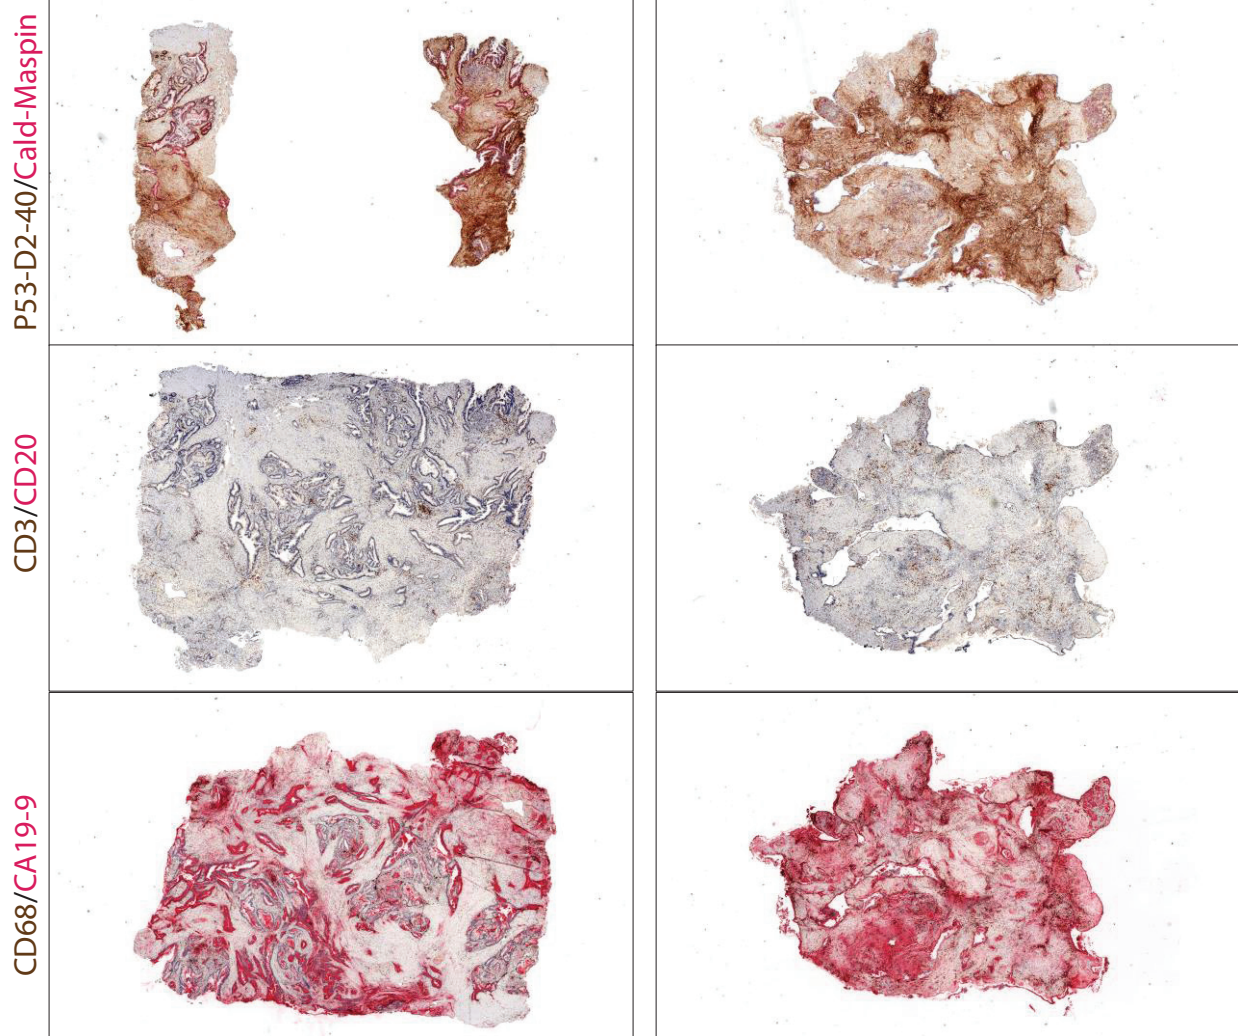

**B.**

Cancer-associated stroma (OT5)

Residual pancreatic stroma (OT7)

|               | 0 h  | 72 h  |
|---------------|------|-------|
| Vimentin      | 51.0 | 38.2  |
| $\alpha$ -SMA | 68.1 | 42.1  |
| CD34          | 3.0  | 6.0   |
| D2-40         | 55.0 | 63.0  |
| CD3           | 4.7  | 4.4   |
| CD20          | 0.01 | 0.002 |
| CD68          | 8.4  | 18.0  |

Color scale: 0% (lightest), 20%, 40%, 60% (darkest)

|               | 0 h  | 72 h |
|---------------|------|------|
| Vimentin      | 35.0 | 23.5 |
| $\alpha$ -SMA | 9.9  | 8.8  |
| CD34          | 15.0 | 5.0  |
| D2-40         | 13.5 | 14.0 |
| CD3           | 10.2 | 3.3  |
| CD20          | 0.2  | 0.1  |
| CD68          | 11.8 | 19.3 |

Color scale: 0% (lightest), 10%, 20%, 30% (darkest)

**Supplementary Figure S4.** (A) Photomicrographs of control (0 h) and cultured (72 h) organotypic slices from a well differentiated tumor (OT5) stained with immunohistochemical markers for the characterization of stroma (vimentin,  $\alpha$ SMA, CD34, D2-40) and immune cells (CD3, CD20 and CD68). (B) Quantification of stroma and immune markers, expressed as their extent (%) in the whole tissue area.

**Supplementary Figure S5**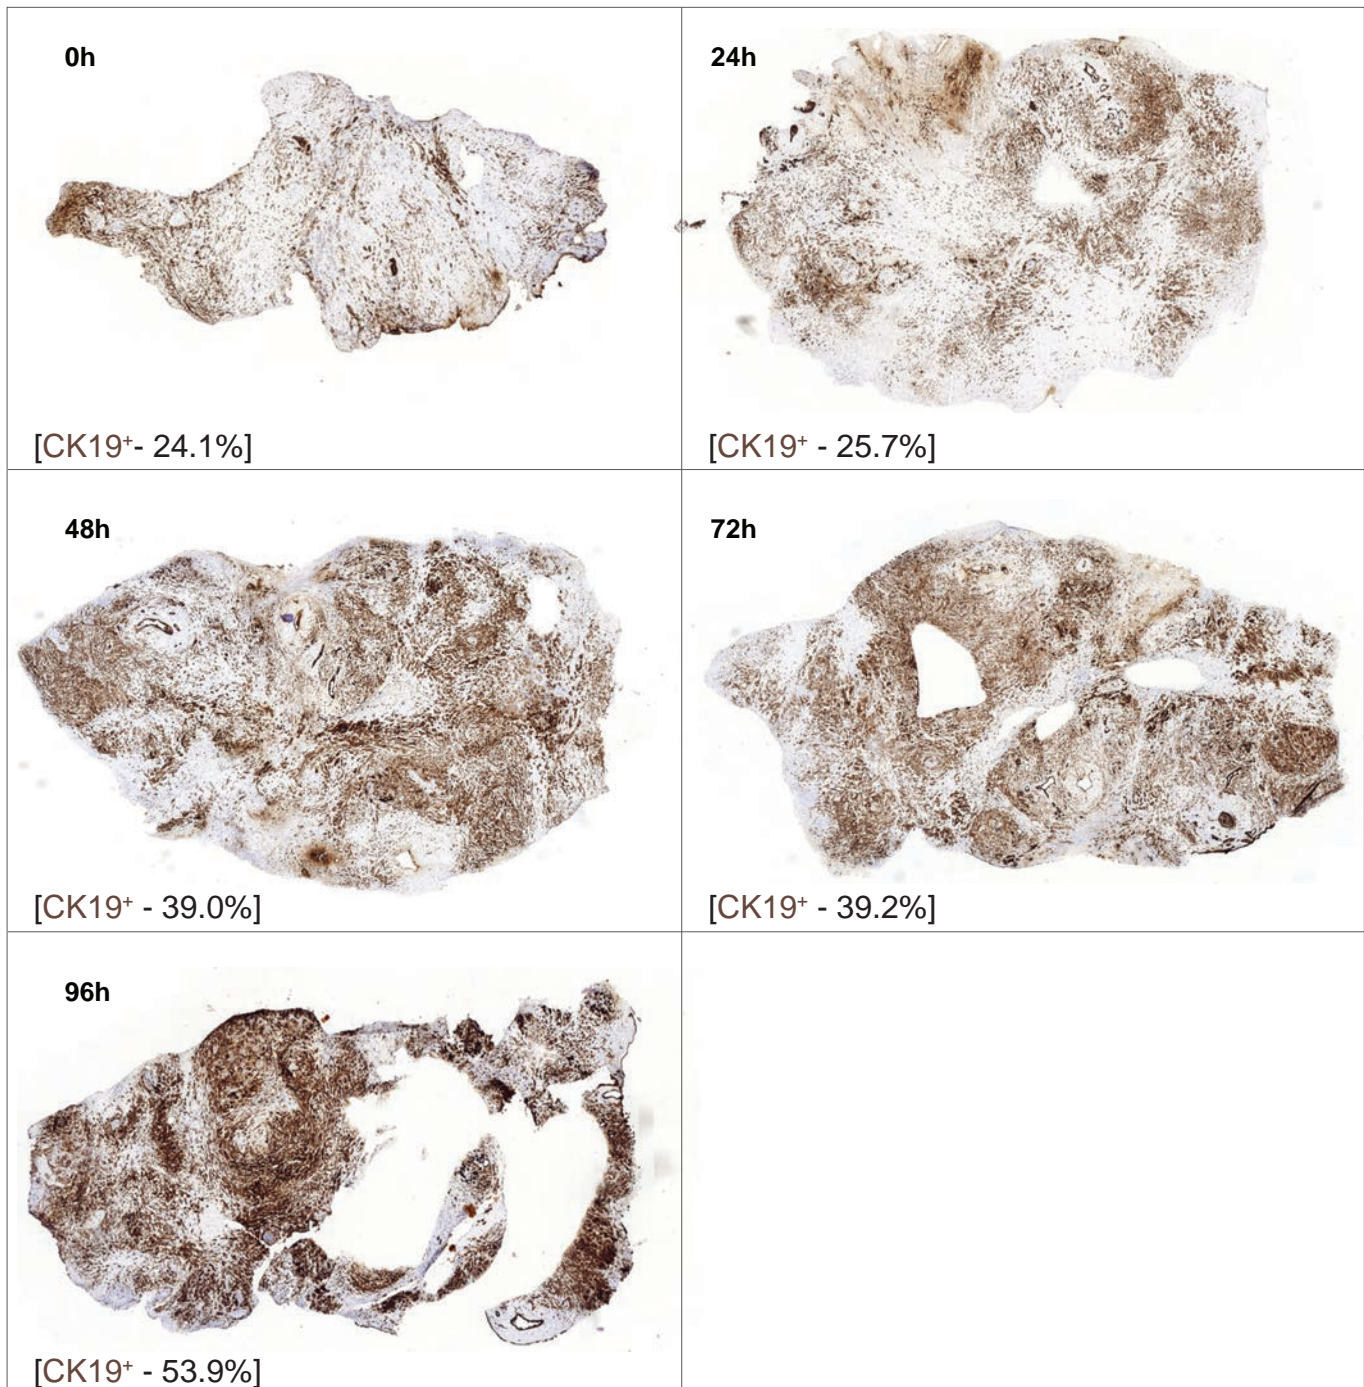

**Supplementary Figure S5.** Immunohistochemical staining for CK19 (OT2) at all time points, showing a progressive increase in the number of cancer cells within the tissue slice. CK19 positivity indicates area occupancy of cancerous cells within the tissue slices.



## Supplementary Figure S6

A.

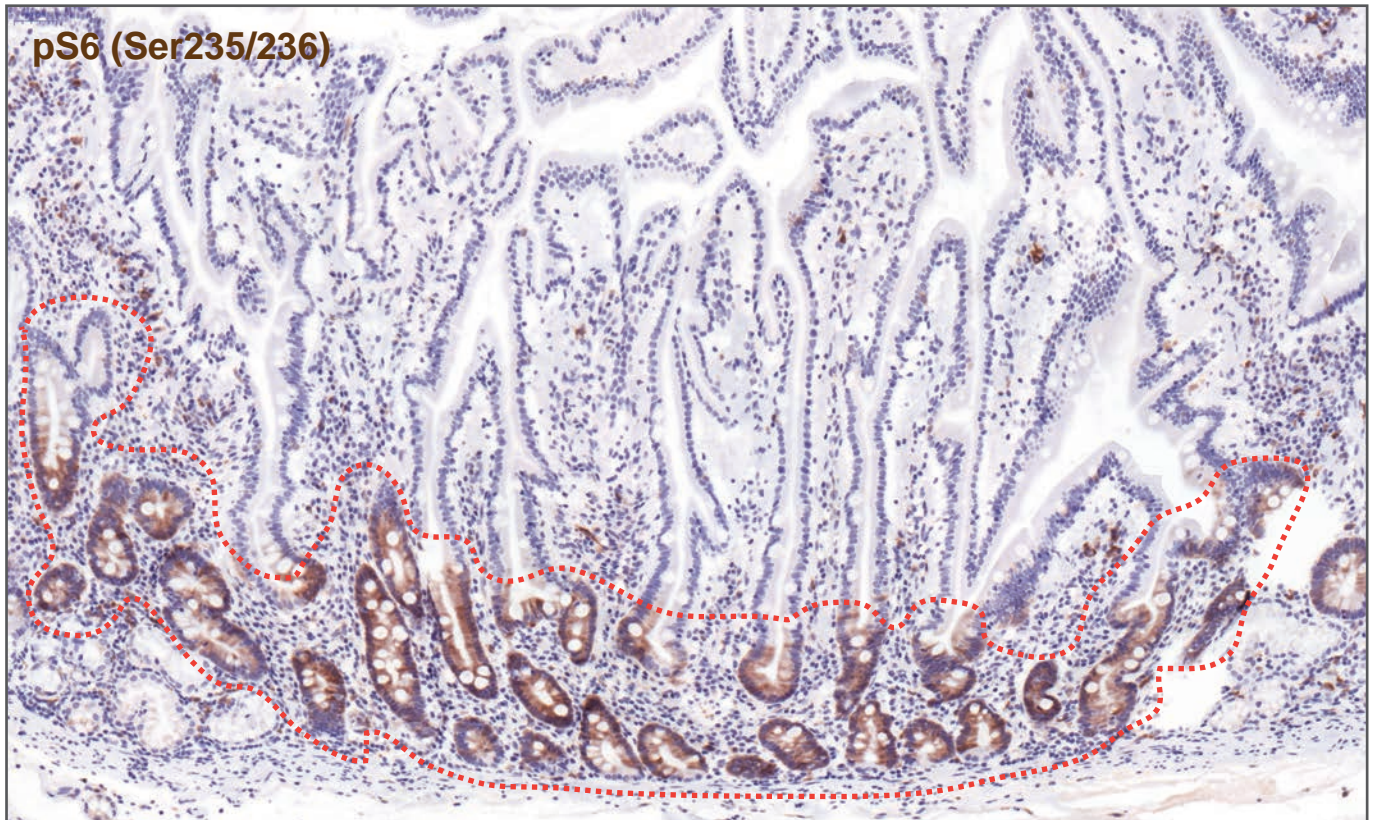

B.

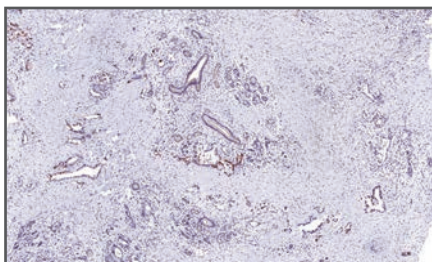

Control tissue at acquisition

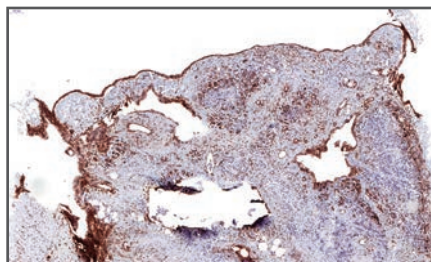

Control tissue after 96 h culture

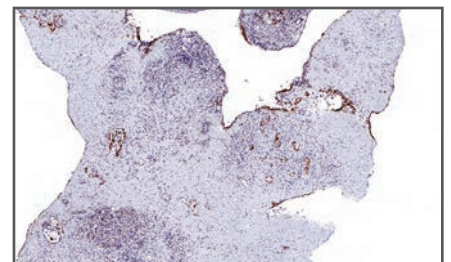

Rapamycin treatment - 72 h

**Supplementary Figure S6.** (A) Positive immunohistochemical staining for pS6 in duodenal crypt cells was used as a positive control. (B) pS6 staining in cultured tissue slice either untreated or subjected to rapamycin (50 nM) treatment for 72 h. Matched control tissue at acquisition was used to assess the pS6 positivity prior to culture.

## Supplementary Figure S7

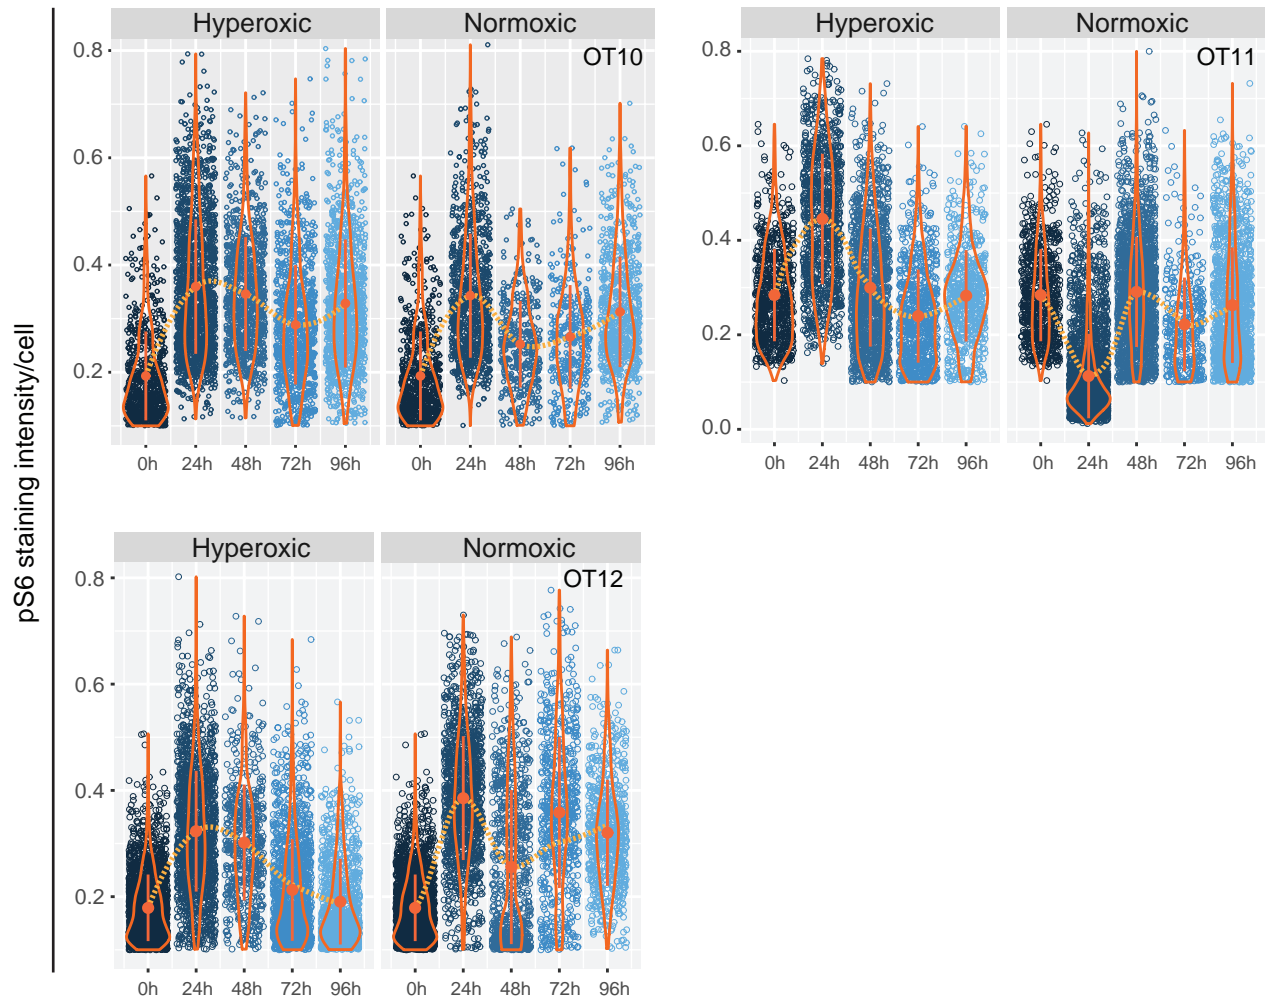

**Supplementary Figure S7.** Temporal changes in pS6 staining intensity of cancerous cells in patient-matched tissue slices under hyperoxic or normoxic conditions ( $n=3$ ). The dotted lines show the conditional mean smooth curve fitted to the data points.

**Supplementary Table 1:** Antibody list for immunohistochemical analysis.

| <b>Antibody</b>       | <b>Clone name</b> | <b>Dilution</b> | <b>Product code</b> |
|-----------------------|-------------------|-----------------|---------------------|
| Actin (smooth muscle) | 1A4               | 1:500           | M0851               |
| CA19-9                | CA241:5:1:4       | 1:400           | NCL-L-CA19-9        |
| CAIX                  | TH22              | 1:25            | NCL-L-CAIX          |
| Caldesmon             | h-CD              | 1:300           | M3557               |
| CD20                  | L26               | 1:1000          | M0755               |
| CD3                   | LN10              | 1:100           | NCL-L-CD3-565       |
| CD34                  | QBEnd/10          | 1:50            | M7165               |
| CD68                  | PG-M1             | 1:100           | M0876               |
| CK18                  | DC-10             | 1:50            | M7010               |
| CK19                  | b170              | 1:100           | NCL-CK19            |
| D2-40                 | D2-40             | 1:50            | M3619               |
| Ki-67                 | MIB-1             | 1:100           | M7240               |
| Maspin                | G167-70           | 1:300           | BDP 554292          |
| p53                   | DO-7              | 1:300           | NCL-L-p53-DO7       |
| SMAD4                 | B-8               | 1:300           | sc-7966             |
| pS6 ribosomal protein |                   | 1:100           | 2211S               |
| Trypsin               | Not available     | 1:100000        | MAB1482             |
| Vimentin              | V9                | 1:1500          | M0725               |

Antibody suppliers:

BDP: BD Pharmingen - BD Biosciences, Franklin Lakes, New Jersey, United States.

M: Dako - Agilent: Dako, Glostrup, Denmark.

MAB: Millipore – Merck, Billerica, Massachusetts, United States.

NCL: Novocastra Leica Biosystems Ltd, Newcastle Upon Tyne, United Kingdom.

sc: Santa Cruz Biotechnology, Inc., Dallas, United States.

pS6 – Cell Signaling Technology, Leiden, Netherlands.

All listed antibodies were stained using a Leica BOND III automated immunostainer, with exception of CAIX and pS6 that were stained in a Ventana Benchmark Ultra immunostainer.
